# Supplementary material
Source: publisher site journal article supplement (https://www.dovepress.com/article/352719)
Supplement: Supplementary file 1 [file get_supplementary_file.php]

**SUPPLEMENTAL MATERIALS**

**Supplemental Table S1.** *CYP2D6* and *CYP3A* genotype-phenotype translation table of variants observed in PhACS participants.

| *Gene* | *Allele* | *Rs number* | *PM* | *IM* | *EM* | *UM* |
| --- | --- | --- | --- | --- | --- | --- |
| *CYP3A* | **3*  **22* | *rs776746*  *rs35599367* | **3/*3, *1/*22*  **3/*3, *22/*22* | **3/*3*  **1/*3,*1/*22* | **1/*1,*  **1/*3* | *-* |
| *CYP2D6* | **3*  **4*  **9*  **10*  **41*  **5*  *xN* | *rs35742686*  *rs3892097*  *rs5030656*  *rs1065852*  *rs28371725*  *Deletion*  *Duplication* | **3/*4/*10*  **4/*4, *10/*10*  **4/*5/*10*  **4/*5* | **1/*3*  **3/*10*  **3/*41*  **4/*10*  **4/*10/*10*  **4/*41/*10*  **41/*10*  **41/*41*  **1/*5*  **5/*41*  **5/*41/*9*  **5/*9*  **5/*9*  **9/*4/*10* | **1/*1*  **1/*10*  **1/*9*  **1/*41*  *xN/*4/*10* | *xN*  *xN/*10*  *xN/*41*  *xN/*4/*10* |

PM, poor metabolizers; IM, intermediate metabolizers; EM, extensive metabolizers; UM, ultrarapid metabolizer. * Allele nomenclature are per PharmVar at https://www.pharmvar.org/genes.

**Supplemental Table S2.** Steady-state plasma drug levels in study participants.

| Daily dose (mg) | Number of subjects | Plasma concentration in ng/mL  (median (IQR)) |
| --- | --- | --- |
| 1.25 | 125 | 5.90 (4.55-7.65) |
| 2.5 | 294 | 10.94 (8.61-14.14) |
| 3.75 | 20 | 18.17 (14.55-22.95) |
| 5 | 151 | 23.77 (18.33-29.29) |
| 6.25 | 2 | 55.34 |
| 7.5 | 16 | 33.97 (30.65-40.46) |
| 10 | 42 | 46.22 (29.36-53.02) |
| 20 | 3 | 105.49 |

IQR, interquartile range.

**Supplemental Table S3.** Comparison of the goodness of fit for the different pharmacokinetic models.

| **Model No.** | **Model** | **-2LL** | **BIC** |
| --- | --- | --- | --- |
| 1 | Basic Model | 4108.36 | 4147.25 |
| 2 | 1 + AGE (mean centred) on CL | 4012.09 | 4057.46 |
| 3 | 2 + WEIGHT (mean centred) on CL | 3975.07 | 4026.92 |
| 4 | 3 + DIURETICS on CL | 3954.12 | 4012.45 |
| 5 | 4 + SMOKING on CL | 3945.36 | 4010.18 |
| 6 | 5 + SEX on CL | 3939.39 | 4010.69 |
| 7 | 6 + CRF on CL | 3955.33 | 4039.59 |

-2LL, -2.log likelihood; BIC, Bayes information criterion; CRF, chronic renal failure.

**Supplemental Table S4.** *CYP2D6* and *CYP3A* genotype frequencies in PhACS patients.

| *CYP2D6* |  |  |  |  |  |  |
| --- | --- | --- | --- | --- | --- | --- |
| Variation | **Star (*) Allele** | **WT/WT**  **(N)** | **WT/Variant**  **(N)** | **Variant/Variant**  **(N)** | **Variant Allele Frequency** | **Info score** |
|  |  |  |  |  |  |  |
| rs35742686 | *3 | 560 | 31 | 0 | 0.026 | 0.854 |
| rs3892097 | *4 | 371 | 199 | 20 | 0.202 | 0.979 |
| rs5030656 | *9 | 580 | 10 | 0 | 0.008 | 0.711 |
| rs1065852 | *10 | 364 | 202 | 24 | 0.212 | 0.980 |
| rs28371725 | *41 | 492 | 93 | 5 | 0.087 | 0.992 |
|  |  |  |  |  |  |  |
| Copy number variation |  | **2 copies** | **< 2 copies**  **(N, %)** | **>2 copies**  **(N, %)** |  |  |
| Deletion | *5 | 529 | 40 (7.6) |  |  | - |
| Duplication | - |  | 20 (3.8) |  | - |
|  |  |  |  |  |  |  |
| *CYP3A* |  |  |  |  |  |  |
| rs35599367 | 3A4*22 | 557 | 48 | 2 | 0.082 | 0.895 |
| rs776746 | 3A5*3 | 2 | 65 | 555 | 0.945 | 1.00 |

WT, wild-type; N, number of alleles. * Allele nomenclature are per PharmVar at https://www.pharmvar.org/genes.

**Supplemental Table S5.** Bisoprolol clearance in different CYP2D6 and CYP3A genotype-based metaboliser phenotypes.

| CYP2D6 Phenotype | N | % | Clearance (median, IQR) | P value |
| --- | --- | --- | --- | --- |
| Poor metabolizers | 31 | 5.2 | 10.8 [9.9-12.0] | 0.83 |
| Intermediate metabolizers | 246 | 41.6 | 11.2 [9.6-13.0] |
| Extensive metabolizers | 300 | 50.8 | 11.4 [9.7-13.1] |
| Ultrarapid metabolizers | 14 | 2.4 | 11.6 [9.0-13.3] |
| CYP3A Phenotype | **N** | **%** | **Clearance (median, IQR)** | **P value** |
| Poor metabolizers | 45 | 7.2 | 10.7 [9.1-12.2] | 0.19 |
| Intermediate metabolizers | 516 | 83.0 | 11.4 [9.7-13.2] |
| Extensive metabolizers | 61 | 9.8 | 11.1 [9.6-12.7] |

PM, poor metabolizer; IM, intermediate metabolizer; EM, extensive metabolizer; UM, ultrarapid metabolizer. Analysis has been undertaken using ANOVA.

**Supplemental Table S6.** Association results for variants with p values ≤ 5x10-6 in PhACS observed in both cohorts analysed.

|  | | | | | **PhACS study** | | | | | **GENRES study** | | | | | | | | |
| --- | --- | --- | --- | --- | --- | --- | --- | --- | --- | --- | --- | --- | --- | --- | --- | --- | --- | --- |
| **Estimated clearance of bisoprolol** | | | | |  | **HR change on bisoprolol in office measurements** | | | | **HR change on bisoprolol in ambulatory 24-hour measurements** | | | |
| rsid | chr | Position (build 38) | Reference  allele | Variant allele | Imputation quality | Variant allele frequency | n | Beta (variant allele) | P | Imputation quality (all were imputed) | Variant allele frequency | n | beta (variant allele) | P | Variant allele frequency | n | beta (variant allele) | P |
| rs11029955 | 11 | 27332940 | G | T | 0.997 | 0.316 | 622 | 2.22 | 7.17E-09 | 0.911 | 0.312 | 216 | -1.06 | 4.86E-02 | 0.320 | 206 | -1.78 | 9.31E-05 |
| rs7935021 | 11 | 27351889 | C | T | 1.000 | 0.314 | 622 | -2.18 | 1.12E-08 | 0.912 | 0.688 | 216 | 1.06 | 4.83E-02 | 0.680 | 206 | 1.77 | 9.29E-05 |
| rs61887779 | 11 | 27342713 | G | A | 0.992 | 0.276 | 622 | 2.28 | 1.17E-08 | 0.931 | 0.289 | 216 | -1.60 | 3.01E-03 | 0.296 | 206 | -1.62 | 4.38E-04 |
| rs1871254 | 11 | 27348359 | T | C | 0.996 | 0.277 | 622 | 2.27 | 1.20E-08 | 0.931 | 0.290 | 216 | -1.60 | 3.00E-03 | 0.296 | 206 | -1.63 | 4.12E-04 |
| rs2291022 | 11 | 27349041 | T | C | 0.996 | 0.277 | 622 | 2.27 | 1.21E-08 | 0.931 | 0.289 | 216 | -1.60 | 3.01E-03 | 0.296 | 206 | -1.62 | 4.38E-04 |
| rs116702638 | 2 | 100298868 | G | T | 0.568 | 0.010 | 622 | 12.54 | 2.54E-08 | 0.942 | 0.022 | 216 | 0.92 | 5.85E-01 | 0.023 | 206 | 0.61 | 6.66E-01 |
| rs73605166 | 16 | 75277831 | G | C | 0.823 | 0.035 | 622 | 5.56 | 1.13E-07 | 0.826 | 0.007 | 216 | 2.54 | 4.19E-01 | 0.007 | 206 | -5.77 | 2.82E-02 |
| rs182390658 | 11 | 25552958 | A | G | 0.485 | 0.012 | 622 | 12.16 | 1.40E-07 | 0.874 | 0.046 | 216 | -0.36 | 7.70E-01 | 0.048 | 206 | 2.22 | 3.01E-02 |
| rs78706212 | 11 | 25989371 | G | A | 0.770 | 0.014 | 622 | 8.92 | 1.89E-07 | 0.934 | 0.068 | 216 | -0.45 | 6.46E-01 | 0.062 | 206 | 0.33 | 7.19E-01 |
| rs111560531 | 16 | 75400055 | C | G | 0.798 | 0.012 | 622 | 9.01 | 4.43E-07 |  |  |  |  |  |  |  |  |  |
| rs147630895 | 12 | 13319429 | T | G | 0.591 | 0.017 | 622 | 8.97 | 5.99E-07 | 0.948 | 0.019 | 216 | -0.53 | 7.67E-01 | 0.020 | 206 | 1.07 | 4.81E-01 |
| rs72911572 | 2 | 174213632 | T | C | 0.959 | 0.012 | 622 | 8.01 | 6.01E-07 | 0.988 | 0.002 | 216 | -1.98 | 6.90E-01 | 0.002 | 206 | -2.35 | 5.74E-01 |
| rs113291240 | 5 | 170772293 | G | A | 0.848 | 0.019 | 622 | 6.87 | 7.19E-07 | 0.956 | 0.042 | 216 | -1.63 | 1.82E-01 | 0.044 | 206 | 0.60 | 5.57E-01 |
| rs142946966 | 11 | 35951773 | A | G | 0.530 | 0.017 | 622 | 9.19 | 7.64E-07 | 0.515 | 0.005 | 216 | -6.61 | 1.42E-01 | 0.006 | 206 | -4.99 | 1.89E-01 |
| rs150674165 | 11 | 35952297 | G | A | 0.529 | 0.017 | 622 | 9.19 | 7.76E-07 | 0.516 | 0.005 | 216 | -6.62 | 1.42E-01 | 0.006 | 206 | -5.02 | 1.87E-01 |
| rs73107290 | 12 | 51831842 | A | T | 0.781 | 0.021 | 622 | 6.89 | 7.82E-07 | 0.897 | 0.024 | 216 | -2.21 | 1.79E-01 | 0.025 | 206 | -0.96 | 4.91E-01 |
| rs139592416 | 2 | 174260683 | A | G | 0.955 | 0.013 | 622 | 7.84 | 8.51E-07 | 0.978 | 0.002 | 216 | -2.00 | 6.90E-01 | 0.002 | 206 | -2.38 | 5.74E-01 |
| rs41287484 | 10 | 103286975 | G | A | 0.809 | 0.014 | 622 | 8.18 | 9.56E-07 | 0.957 | 0.033 | 216 | 1.87 | 1.71E-01 | 0.034 | 206 | 0.79 | 4.93E-01 |
| rs201842061 | 11 |  | AAAAAT | A | 0.813 | 0.011 | 622 | 9.15 | 1.34E-06 |  |  |  |  |  |  |  |  |  |
| rs75641511 | 16 | 75424962 | C | T | 0.888 | 0.041 | 622 | 4.49 | 1.55E-06 | 0.985 | 0.005 | 216 | 3.21 | 3.64E-01 | 0.005 | 206 | -6.74 | 2.28E-02 |
| rs113262361 | 16 | 75427646 | T | G | 0.887 | 0.041 | 622 | 4.49 | 1.57E-06 | 0.985 | 0.005 | 216 | 3.21 | 3.64E-01 | 0.005 | 206 | -6.74 | 2.28E-02 |
| rs6859992 | 5 | 170770116 | T | A | 0.786 | 0.031 | 622 | 5.54 | 1.58E-06 | 1.036 | 0.053 | 216 | -1.65 | 1.14E-01 | 0.056 | 206 | 0.86 | 3.29E-01 |
| rs147435903 | 12 | 13349465 | T | C | 0.540 | 0.016 | 622 | 9.24 | 1.74E-06 | 0.937 | 0.016 | 216 | 0.32 | 8.69E-01 | 0.017 | 206 | 1.04 | 5.24E-01 |
| rs143792050 | 7 | 7883100 | GGAA | G | 0.808 | 0.046 | 622 | 4.24 | 1.80E-06 |  |  |  |  |  |  |  |  |  |
| rs142464277 | 16 | 75307311 | G | C | 0.894 | 0.039 | 622 | 4.54 | 2.01E-06 | 0.902 | 0.005 | 216 | 2.99 | 3.86E-01 | 0.006 | 206 | -6.73 | 1.95E-02 |
| rs5858910 | 4 | 64711470 | AT | A | 0.966 | 0.052 | 622 | -3.88 | 2.06E-06 | 1.182 | 0.979 | 216 | -3.78 | 1.23E-02 | 0.978 | 206 | -2.93 | 2.14E-02 |
| rs75469826 | 1 | 1254826 | G | A | 0.866 | 0.015 | 622 | 7.32 | 2.07E-06 | 0.960 | 0.005 | 216 | 1.12 | 7.50E-01 | 0.005 | 206 | -2.56 | 3.87E-01 |
| rs146919335 | 1 | 29794629 | ATATACATATG | A | 0.883 | 0.188 | 622 | 2.18 | 2.08E-06 |  |  |  |  |  |  |  |  |  |
| rs12069094 | 1 | 1260213 | G | A | 0.859 | 0.015 | 622 | 7.33 | 2.09E-06 | 0.986 | 0.005 | 216 | 0.98 | 7.80E-01 | 0.005 | 206 | -2.51 | 3.97E-01 |
| rs111357358 | 1 | 1274102 | G | A | 0.876 | 0.016 | 622 | 6.99 | 2.11E-06 | 0.995 | 0.005 | 216 | 0.94 | 7.90E-01 | 0.005 | 206 | -2.49 | 4.01E-01 |
| rs11260568 | 1 | 1260310 | G | C | 0.884 | 0.016 | 622 | 6.94 | 2.48E-06 | 0.986 | 0.005 | 216 | 0.98 | 7.80E-01 | 0.005 | 206 | -2.51 | 3.97E-01 |
| rs72894077 | 1 | 1260994 | C | T | 0.887 | 0.016 | 622 | 6.93 | 2.51E-06 | 0.986 | 0.005 | 216 | 0.98 | 7.80E-01 | 0.005 | 206 | -2.51 | 3.97E-01 |
| rs144550187 | 12 | 115478312 | G | A | 0.874 | 0.015 | 622 | 6.67 | 2.63E-06 | 0.813 | 0.006 | 216 | -2.09 | 5.41E-01 | 0.006 | 206 | 1.17 | 6.83E-01 |
| rs7552460 | 1 | 1278550 | T | C | 0.863 | 0.017 | 622 | 6.89 | 2.97E-06 | 0.751 | 0.003 | 216 | 1.68 | 7.25E-01 | 0.004 | 206 | -3.82 | 3.40E-01 |
| rs112909007 | 6 | 170055783 | C | T | 0.961 | 0.034 | 622 | 4.53 | 3.00E-06 |  |  |  |  |  |  |  |  |  |
| rs75958385 | 16 | 75369599 | G | A | 0.743 | 0.024 | 622 | 6.28 | 3.04E-06 | 0.995 | 0.005 | 216 | 3.09 | 3.79E-01 | 0.005 | 206 | -6.75 | 2.21E-02 |
| rs57834430 | 1 | 1279882 | T | C | 0.859 | 0.017 | 622 | 6.88 | 3.06E-06 | 0.704 | 0.003 | 216 | 1.82 | 7.20E-01 | 0.003 | 206 | -4.12 | 3.37E-01 |
| rs7547316 | 1 | 1280416 | A | G | 0.858 | 0.017 | 622 | 6.88 | 3.08E-06 | 0.685 | 0.003 | 216 | 1.89 | 7.19E-01 | 0.003 | 206 | -4.25 | 3.35E-01 |
| rs144072398 | 12 | 23208095 | C | T | 0.798 | 0.010 | 622 | 9.11 | 3.16E-06 | 0.858 | 0.012 | 216 | -1.26 | 5.94E-01 | 0.013 | 206 | 1.01 | 6.12E-01 |
| rs144247165 | 16 | 75180019 | G | A | 0.865 | 0.014 | 622 | 7.52 | 3.17E-06 | 0.893 | 0.033 | 216 | 0.82 | 5.61E-01 | 0.034 | 206 | -1.73 | 1.48E-01 |
| rs7547329 | 1 | 1280469 | A | T | 0.795 | 0.018 | 622 | 6.81 | 3.28E-06 |  |  |  |  |  |  |  |  |  |
| rs144223751 | 4 | 65034248 | G | T | 0.966 | 0.022 | 622 | 5.71 | 3.30E-06 | 0.974 | 0.023 | 216 | -1.26 | 4.33E-01 | 0.024 | 206 | -0.95 | 4.81E-01 |
| rs146550601 | 4 | 65034255 | A | G | 0.966 | 0.022 | 622 | 5.71 | 3.30E-06 | 0.974 | 0.023 | 216 | -1.26 | 4.33E-01 | 0.024 | 206 | -0.95 | 4.81E-01 |
| rs190282934 | 4 | 82172089 | A | G | 0.737 | 0.159 | 622 | 2.52 | 3.49E-06 |  |  |  |  |  |  |  |  |  |
| rs12073801 | 1 | 1284551 | G | T | 0.850 | 0.017 | 622 | 6.82 | 3.55E-06 | 0.545 | 0.002 | 216 | 2.77 | 6.85E-01 | 0.002 | 206 | -5.62 | 3.28E-01 |
| rs74742580 | 6 | 170051397 | G | A | 0.964 | 0.034 | 622 | 4.51 | 3.61E-06 | 0.933 | 0.101 | 216 | 0.81 | 3.23E-01 | 0.101 | 206 | 0.93 | 1.86E-01 |
| rs78964579 | 7 | 7860959 | G | C | 0.967 | 0.032 | 622 | 4.60 | 4.00E-06 | 0.948 | 0.034 | 216 | -0.72 | 5.96E-01 | 0.033 | 206 | -0.75 | 5.23E-01 |
| rs10835164 | 11 | 27333395 | C | T | 0.999 | 0.247 | 622 | 1.87 | 4.07E-06 | 1.012 | 0.211 | 216 | -0.39 | 4.98E-01 | 0.214 | 206 | -1.59 | 1.22E-03 |
| rs3929244 | 11 | 27333484 | C | T | 1.000 | 0.248 | 622 | 1.87 | 4.12E-06 | 1.012 | 0.211 | 216 | -0.39 | 4.98E-01 | 0.214 | 206 | -1.59 | 1.22E-03 |
| rs12277574 | 11 | 27333295 | C | G | 1.000 | 0.248 | 622 | 1.87 | 4.12E-06 | 1.012 | 0.211 | 216 | -0.39 | 4.98E-01 | 0.214 | 206 | -1.59 | 1.22E-03 |
| rs11029954 | 11 | 27332902 | C | T | 0.999 | 0.248 | 622 | 1.87 | 4.13E-06 | 1.012 | 0.211 | 216 | -0.39 | 4.98E-01 | 0.214 | 206 | -1.59 | 1.22E-03 |
| rs11029953 | 11 | 27332839 | T | G | 0.999 | 0.248 | 622 | 1.87 | 4.13E-06 | 1.012 | 0.211 | 216 | -0.39 | 4.98E-01 | 0.214 | 206 | -1.59 | 1.22E-03 |
| rs11753156 | 6 | 170050020 | C | T | 0.962 | 0.033 | 622 | 4.49 | 4.14E-06 | 0.933 | 0.101 | 216 | 0.81 | 3.24E-01 | 0.101 | 206 | 0.93 | 1.86E-01 |
| rs10835163 | 11 | 27331762 | A | G | 0.998 | 0.248 | 622 | 1.87 | 4.15E-06 | 1.011 | 0.211 | 216 | -0.39 | 4.98E-01 | 0.214 | 206 | -1.59 | 1.22E-03 |
| rs11759102 | 6 | 19837543 | C | T | 0.804 | 0.137 | 622 | 2.56 | 4.15E-06 |  |  |  |  |  |  |  |  |  |
| rs1564243 | 11 | 27333735 | C | T | 0.999 | 0.248 | 622 | 1.87 | 4.15E-06 | 1.012 | 0.211 | 216 | -0.39 | 4.98E-01 | 0.214 | 206 | -1.59 | 1.22E-03 |
| rs77361612 | 6 | 170050094 | G | A | 0.961 | 0.034 | 622 | 4.49 | 4.16E-06 | 0.969 | 0.108 | 216 | 0.67 | 3.90E-01 | 0.108 | 206 | 1.02 | 1.29E-01 |
| rs10767638 | 11 | 27330940 | A | G | 0.997 | 0.248 | 622 | 1.87 | 4.16E-06 | 1.011 | 0.211 | 216 | -0.39 | 4.98E-01 | 0.214 | 206 | -1.59 | 1.23E-03 |
| rs11029951 | 11 | 27330510 | T | C | 0.996 | 0.248 | 622 | 1.87 | 4.16E-06 | 1.011 | 0.211 | 216 | -0.39 | 4.98E-01 | 0.214 | 206 | -1.59 | 1.23E-03 |
| rs72756295 | 5 | 54299824 | G | C | 0.969 | 0.024 | 622 | 5.39 | 4.48E-06 | 0.967 | 0.016 | 216 | -0.63 | 7.46E-01 | 0.017 | 206 | 2.09 | 1.99E-01 |
| rs10835166 | 11 | 27334415 | C | T | 0.997 | 0.248 | 622 | 1.87 | 4.50E-06 | 1.012 | 0.211 | 216 | -0.39 | 4.98E-01 | 0.214 | 206 | -1.59 | 1.22E-03 |
| rs72756291 | 5 | 54299018 | C | A | 0.969 | 0.024 | 622 | 5.38 | 4.57E-06 | 0.971 | 0.016 | 216 | -0.63 | 7.46E-01 | 0.017 | 206 | 2.08 | 2.01E-01 |
| rs10767639 | 11 | 27336931 | C | G | 0.994 | 0.211 | 622 | 1.99 | 4.62E-06 | 1.012 | 0.188 | 216 | -1.07 | 7.70E-02 | 0.189 | 206 | -1.50 | 3.63E-03 |
| rs111372870 | 12 | 51699955 | T | C | 0.507 | 0.011 | 622 | 10.65 | 4.73E-06 | 0.881 | 0.025 | 216 | -2.12 | 1.94E-01 | 0.026 | 206 | -0.82 | 5.52E-01 |
| rs2352924 | 14 | 49007342 | A | G | 1.000 | 0.168 | 622 | 2.09 | 4.74E-06 | 0.956 | 0.211 | 216 | -0.92 | 1.22E-01 | 0.214 | 206 | -1.21 | 1.88E-02 |
| rs77433444 | 6 | 170048945 | G | A | 0.958 | 0.033 | 622 | 4.48 | 4.76E-06 | 0.933 | 0.101 | 216 | 0.81 | 3.25E-01 | 0.101 | 206 | 0.93 | 1.86E-01 |
| rs11607287 | 11 | 27342943 | T | C | 0.995 | 0.211 | 622 | 1.99 | 4.88E-06 | 1.012 | 0.188 | 216 | -1.07 | 7.70E-02 | 0.189 | 206 | -1.50 | 3.63E-03 |
| rs11029961 | 11 | 27345473 | C | T | 0.995 | 0.211 | 622 | 1.98 | 4.95E-06 | 1.012 | 0.188 | 216 | -1.07 | 7.70E-02 | 0.189 | 206 | -1.50 | 3.63E-03 |

Only variants with p values ≤ 5x10-6 in PhACS. Empty cells represent variants that are not available in GENRES genetic dataset.

# Supplemental Figures


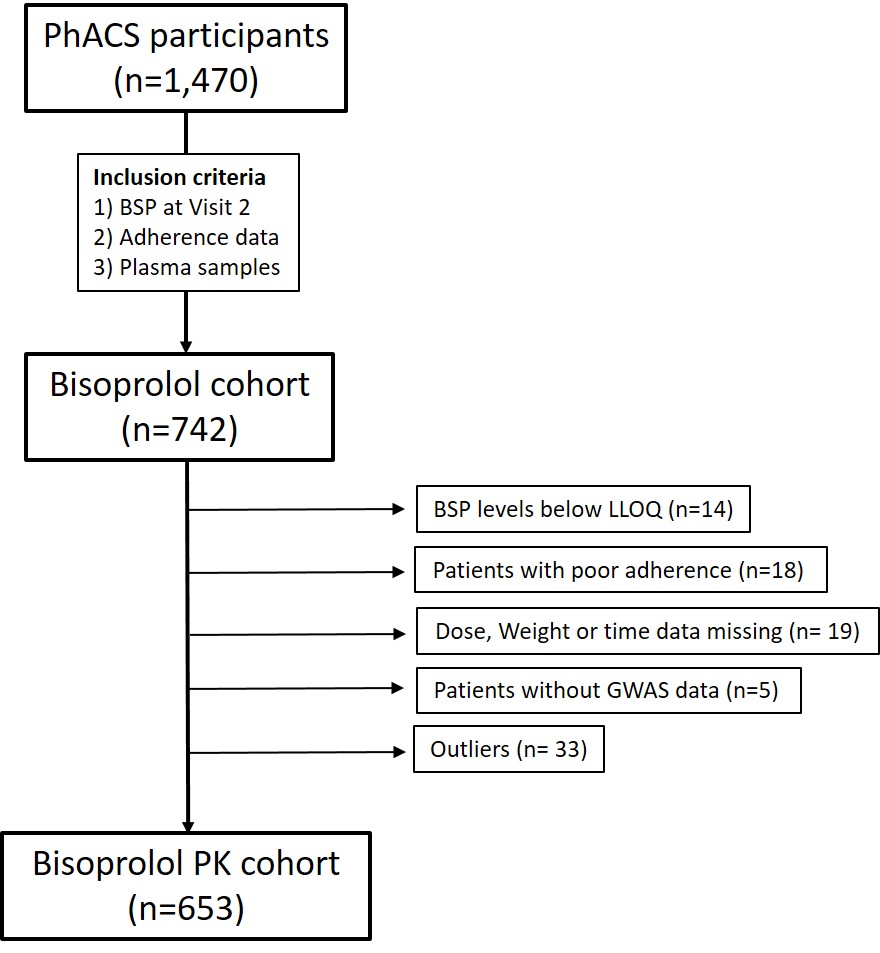


**Figure S1.** PhACS participants included in the pharmacokinetics analysis.


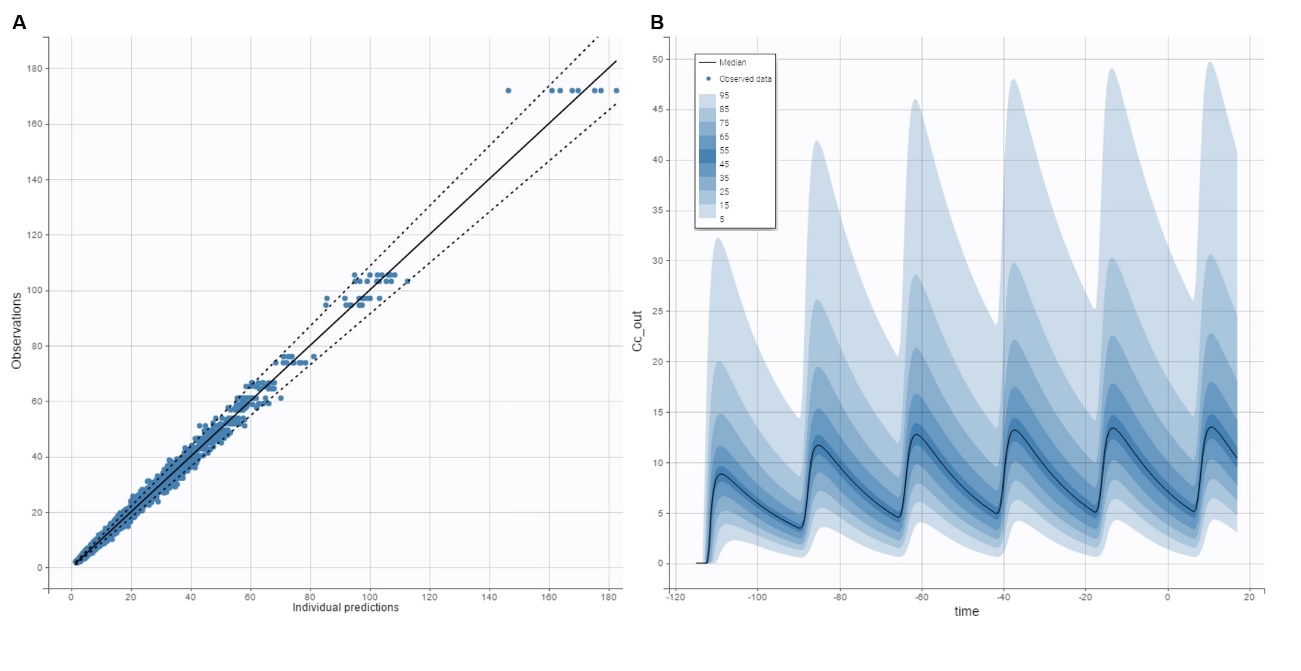


**Figure S2.** Individual predictions versus observations (A), and prediction distribution (B) of the final pharmacokinetic model.
